# Supplementary material
Source: publisher site journal article supplement (https://www.spandidos-publications.com/2825/downloadSupplementary)
Supplement: Supplementary file 1 [file downloadSupplementary]

## Sheet: Sheet1
Table SI. 704 DEMs of SACC tissues.
miRNA ID	P.Value	logFC
hsa-let-7a	0.0366	-0.3375
hsa-let-7b	0.00473	-0.4425
hsa-let-7c	0.181	-0.19833
hsa-let-7d	0.00509	-0.4375
hsa-let-7e	0.372	-0.16333
hsa-let-7f	0.0525	-0.56917
hsa-let-7f-1	0.829	0.06417
hsa-let-7f-2	0.712	-0.05083
hsa-let-7g	0.125	-0.3875
hsa-let-7i	0.0246	-0.55083
hsa-miR-1	0.0415	1.23417
hsa-miR-100	0.137	0.54917
hsa-miR-101	0.216	-0.38917
hsa-miR-103	0.0178	-0.325
hsa-miR-105	0.715	-0.05667
hsa-miR-106a	7.51e-06	-0.82667
hsa-miR-106b	7.24e-09	-1.48167
hsa-miR-107	0.0465	-0.24167
hsa-miR-10a	0.529	-0.44167
hsa-miR-10b	0.0308	0.98583
hsa-miR-1178	0.0255	0.60167
hsa-miR-1179	0.0915	0.33167
hsa-miR-1180	3e-05	-2.18333
hsa-miR-1181	0.0265	0.73667
hsa-miR-1182	0.351	0.16333
hsa-miR-1183	0.0544	-0.56667
hsa-miR-1184	0.243	0.47583
hsa-miR-1185	0.106	0.5025
hsa-miR-1197	0.155	0.31667
hsa-miR-1200	0.659	-0.1275
hsa-miR-1201	0.382	-0.29667
hsa-miR-1202	0.244	-0.44167
hsa-miR-1203	0.237	-0.23917
hsa-miR-1204	0.633	0.05667
hsa-miR-1205	0.0621	0.34417
hsa-miR-1206	0.445	0.135
hsa-miR-1207-3p	0.843	0.04417
hsa-miR-1207-5p	0.0269	0.695
hsa-miR-1208	3.02e-05	-0.88667
hsa-miR-122	0.604	0.13083
hsa-miR-1224-3p	0.0525	0.69083
hsa-miR-1224-5p	0.162	0.9275
hsa-miR-1225-3p	0.0552	0.55167
hsa-miR-1225-5p	0.168	-0.675
hsa-miR-1226	0.00275	-1.00417
hsa-miR-1227	0.139	0.38583
hsa-miR-1228	0.0364	0.9625
hsa-miR-1229	0.941	-0.02
hsa-miR-1231	0.00227	-1.695
hsa-miR-1233	0.562	0.135
hsa-miR-1234	0.000507	1.75167
hsa-miR-1236	0.0758	0.49917
hsa-miR-1237	0.988	0.00333
hsa-miR-1238	0.264	0.3625
hsa-miR-124	0.0541	-0.4525
hsa-miR-1243	0.88	-0.0275
hsa-miR-1244	0.0161	-1.73
hsa-miR-1245	0.354	-0.18333
hsa-miR-1246	0.0378	-0.97333
hsa-miR-1247	0.856	0.0525
hsa-miR-1248	0.0153	0.49583
hsa-miR-1249	0.0501	0.39917
hsa-miR-1250	0.196	0.26833
hsa-miR-1251	0.748	-0.0575
hsa-miR-1252	0.00293	0.4775
hsa-miR-1253	0.0417	-0.36583
hsa-miR-1254	0.0133	-0.75
hsa-miR-1255a	0.578	-0.10667
hsa-miR-1255b	0.568	-0.12833
hsa-miR-1256	0.608	0.0975
hsa-miR-1257	0.0937	0.3925
hsa-miR-1258	0.415	0.125
hsa-miR-1259	0.156	-0.2375
hsa-miR-125a-3p	0.0147	-0.81417
hsa-miR-125a-5p	0.0687	-0.4675
hsa-miR-125b	0.848	-0.02667
hsa-miR-125b-1	3.33e-06	-2.11333
hsa-miR-125b-2	0.336	-0.69917
hsa-miR-126	4e-07	1.2325
hsa-miR-1260	0.265	0.39833
hsa-miR-1261	0.0374	0.3325
hsa-miR-1262	0.0101	-0.67917
hsa-miR-1263	0.324	0.355
hsa-miR-1264	0.0492	0.3525
hsa-miR-1265	0.0682	0.46167
hsa-miR-1266	0.241	-0.21167
hsa-miR-1267	0.0334	0.5025
hsa-miR-1268	0.702	-0.1475
hsa-miR-1269	0.307	-0.475
hsa-miR-1270	0.00127	-1.22333
hsa-miR-1271	0.000158	-1.8275
hsa-miR-1272	0.286	0.29667
hsa-miR-1273	0.00757	0.82583
hsa-miR-127-3p	0.997	-0.0025
hsa-miR-1274a	0.327	0.30167
hsa-miR-1274b	0.755	0.1625
hsa-miR-1275	0.00491	-1.24417
hsa-miR-127-5p	0.394	-0.44167
hsa-miR-1276	0.0292	0.67333
hsa-miR-1277	0.00681	0.49083
hsa-miR-1278	0.0867	0.2975
hsa-miR-1279	0.101	0.3925
hsa-miR-128	4.25e-07	-2.6
hsa-miR-1280	0.0275	0.7525
hsa-miR-1281	0.0209	1.2525
hsa-miR-1282	0.24	0.20917
hsa-miR-1283	0.312	0.13833
hsa-miR-1284	0.251	0.30583
hsa-miR-1285	0.923	0.0325
hsa-miR-1286	0.0205	0.86667
hsa-miR-1287	1.91e-05	-2.11333
hsa-miR-1288	0.0278	0.72
hsa-miR-1289	0.0967	0.36417
hsa-miR-129	0.0023	0.6225
hsa-miR-1290	0.0522	-0.56833
hsa-miR-1291	0.211	-0.39833
hsa-miR-1292	0.0104	-0.52083
hsa-miR-1293	0.414	0.1725
hsa-miR-129-3p	0.0291	0.525
hsa-miR-1294	0.844	0.0525
hsa-miR-1295	0.03	0.65083
hsa-miR-129-5p	0.0195	-0.44667
hsa-miR-1296	7.8e-07	-2.86417
hsa-miR-1297	0.013	0.38417
hsa-miR-1298	0.0244	0.7775
hsa-miR-1299	0.0383	-1.38417
hsa-miR-1300	0.0049	-1.44083
hsa-miR-1301	2.6e-07	-2.31167
hsa-miR-1302	0.879	0.0275
hsa-miR-1303	0.806	-0.07
hsa-miR-1304	0.308	0.24583
hsa-miR-1305	0.361	0.15167
hsa-miR-1306	0.116	-0.325
hsa-miR-1307	0.00054	-2.25833
hsa-miR-1308	0.455	-0.565
hsa-miR-130a	3.97e-06	-1.28417
hsa-miR-130b	0.216	-0.61833
hsa-miR-132	0.000614	-1.73583
hsa-miR-1321	0.563	-0.09833
hsa-miR-1322	0.239	0.20583
hsa-miR-1323	0.235	-0.465
hsa-miR-1324	0.0193	0.62083
hsa-miR-133a	0.0511	1.26917
hsa-miR-133b	0.0186	1.19083
hsa-miR-134	0.847	0.1125
hsa-miR-135a	0.0151	0.42167
hsa-miR-135b	0.549	0.09
hsa-miR-136	0.785	-0.04083
hsa-miR-137	0.123	0.27833
hsa-miR-138	0.00828	2.40917
hsa-miR-138-1	0.00179	1.32833
hsa-miR-138-2	0.23	-0.27417
hsa-miR-139-3p	0.00892	1.1675
hsa-miR-139-5p	0.0356	1.16417
hsa-miR-140-3p	1.48e-05	1.22667
hsa-miR-140-5p	0.0667	-0.8275
hsa-miR-141	0.851	0.08333
hsa-miR-142-3p	0.0168	0.61333
hsa-miR-142-5p	0.413	0.19167
hsa-miR-143	0.607	-0.14
hsa-miR-144	0.123	0.34833
hsa-miR-145	0.233	-0.31333
hsa-miR-146a	0.000708	-1.51083
hsa-miR-146b-3p	0.874	0.04583
hsa-miR-146b-5p	0.0297	-1.1925
hsa-miR-147	0.573	-0.11583
hsa-miR-147b	0.982	0.00417
hsa-miR-148a	0.01	1.68333
hsa-miR-148b	3.93e-05	-2.28
hsa-miR-149	0.547	0.3575
hsa-miR-150	0.00168	2.56583
hsa-miR-151-3p	0.429	-0.17083
hsa-miR-151-5p	0.581	0.11333
hsa-miR-152	9.8e-05	1.59667
hsa-miR-153	0.665	-0.105
hsa-miR-154	0.245	-0.76
hsa-miR-155	0.0864	0.95
hsa-miR-15a	0.0536	-0.99833
hsa-miR-15b	0.27	-0.40083
hsa-miR-16	0.0946	0.2125
hsa-miR-16-1	0.23	-0.20167
hsa-miR-16-2	0.298	0.43083
hsa-miR-17	8.14e-06	-0.72583
hsa-miR-181a	1.87e-06	-1.47167
hsa-miR-181a-2	2.6e-09	-3.49
hsa-miR-181b	2.8e-05	-2.22917
hsa-miR-181c	7.65e-09	-3.24
hsa-miR-181d	9.19e-07	-3.32417
hsa-miR-182	1.85e-06	-1.35917
hsa-miR-1825	0.088	0.87833
hsa-miR-1826	0.0502	0.5625
hsa-miR-1827	0.498	0.12
hsa-miR-183	4.45e-08	-3.21417
hsa-miR-184	0.275	0.54417
hsa-miR-185	0.00988	0.54417
hsa-miR-186	0.289	0.23833
hsa-miR-187	0.309	-0.9925
hsa-miR-188-3p	0.277	-0.31
hsa-miR-188-5p	0.031	-0.865
hsa-miR-18a	0.00237	-1.52167
hsa-miR-18b	8.88e-06	-1.95333
hsa-miR-190	0.00774	0.4425
hsa-miR-190b	0.162	0.3325
hsa-miR-191	0.00464	-0.415
hsa-miR-192	0.00015	-2.1975
hsa-miR-193a-3p	0.325	-0.65917
hsa-miR-193a-5p	0.834	-0.1175
hsa-miR-193b	0.0951	0.8025
hsa-miR-194	3.48e-05	-2.22
hsa-miR-195	0.0508	-0.56333
hsa-miR-196a	0.131	-0.615
hsa-miR-196b	0.311	-0.20417
hsa-miR-197	0.0321	-1.06167
hsa-miR-198	0.0718	-0.4525
hsa-miR-199a-3p	0.027	1.02333
hsa-miR-199a-5p	0.0405	0.95833
hsa-miR-199b-3p	0.021	1.08417
hsa-miR-199b-5p	0.172	0.77417
hsa-miR-19a	3.18e-05	-2.05
hsa-miR-19b	0.0543	-0.34333
hsa-miR-19b-1	0.000308	-0.99667
hsa-miR-19b-2	0.342	0.15833
hsa-miR-200a	0.067	-0.63583
hsa-miR-200b	0.8	0.09083
hsa-miR-200c	0.969	-0.005
hsa-miR-202	0.74	0.11833
hsa-miR-203	0.371	-0.75583
hsa-miR-204	0.152	0.50917
hsa-miR-205	0.885	0.07667
hsa-miR-206	0.0975	1.9025
hsa-miR-208a	0.0143	0.75167
hsa-miR-208b	0.846	0.03
hsa-miR-20a	0.000133	-0.87333
hsa-miR-20b	0.0764	-0.44167
hsa-miR-21	0.00387	-1.19
hsa-miR-210	0.262	0.51417
hsa-miR-211	0.819	0.0675
hsa-miR-212	7.15e-05	-1.4075
hsa-miR-214	0.00328	1.35667
hsa-miR-215	0.457	0.14
hsa-miR-216a	0.161	0.3125
hsa-miR-216b	0.895	-0.04417
hsa-miR-217	0.901	0.02583
hsa-miR-218	0.0184	-0.52917
hsa-miR-218-1	0.287	0.22417
hsa-miR-218-2	0.512	-0.17917
hsa-miR-219-1-3p	0.308	-0.19917
hsa-miR-219-2-3p	0.227	0.25417
hsa-miR-219-5p	0.242	0.24667
hsa-miR-22	0.452	0.24083
hsa-miR-220a	0.299	0.27167
hsa-miR-220b	0.112	0.44917
hsa-miR-220c	0.00123	0.5525
hsa-miR-221	0.523	0.17583
hsa-miR-222	0.0612	0.52833
hsa-miR-223	0.000206	1.4475
hsa-miR-224	0.187	-0.85167
hsa-miR-23a	0.432	0.09417
hsa-miR-23b	0.053	-0.31167
hsa-miR-24	0.141	-0.19083
hsa-miR-24-1	0.0559	-0.785
hsa-miR-24-2	0.00161	-1.32417
hsa-miR-25	8.07e-07	-1.66083
hsa-miR-26a	0.656	0.06083
hsa-miR-26a-1	0.763	-0.05083
hsa-miR-26a-2	0.584	0.11083
hsa-miR-26b	0.0432	-0.7875
hsa-miR-27a	0.442	0.175
hsa-miR-27b	0.0122	-0.66083
hsa-miR-28-3p	0.0313	-0.73667
hsa-miR-28-5p	0.101	-0.57083
hsa-miR-296-3p	0.00682	-1.38167
hsa-miR-296-5p	0.988	-0.00333
hsa-miR-297	0.386	0.15333
hsa-miR-298	0.277	0.28167
hsa-miR-299-3p	0.73	0.17667
hsa-miR-299-5p	0.34	-0.5225
hsa-miR-29a	1.33e-06	1.33667
hsa-miR-29b	0.00361	1.53167
hsa-miR-29b-1	0.552	-0.34667
hsa-miR-29b-2	1.42e-08	2.11
hsa-miR-29c	0.00486	1.90667
hsa-miR-300	0.591	0.11833
hsa-miR-301a	0.00259	-1.56667
hsa-miR-301b	0.553	0.14417
hsa-miR-302a	0.00948	0.455
hsa-miR-302b	0.238	0.20167
hsa-miR-302c	0.124	0.27917
hsa-miR-302d	0.853	0.02583
hsa-miR-302e	0.105	0.395
hsa-miR-302f	0.71	0.07667
hsa-miR-30a	0.44	0.28833
hsa-miR-30b	0.133	-0.53333
hsa-miR-30c	0.0384	-0.595
hsa-miR-30c-1	0.000849	-1.83
hsa-miR-30c-2	0.218	-0.84167
hsa-miR-30d	0.987	0.00333
hsa-miR-30e	0.035	-0.8275
hsa-miR-31	3.11e-05	3.26
hsa-miR-32	0.33	0.375
hsa-miR-320a	0.424	0.11167
hsa-miR-320b	0.454	0.10583
hsa-miR-320c	0.566	0.0875
hsa-miR-320d	0.147	-0.39833
hsa-miR-323-3p	0.0922	-0.59167
hsa-miR-323-5p	0.262	-0.21667
hsa-miR-324-3p	1.82e-05	-1.38417
hsa-miR-324-5p	4.2e-06	-1.90583
hsa-miR-325	0.197	-0.22583
hsa-miR-326	0.172	-0.34167
hsa-miR-328	1.3e-06	-2.10083
hsa-miR-329	0.0427	-0.90333
hsa-miR-330-3p	0.000231	-1.96
hsa-miR-330-5p	0.935	-0.02833
hsa-miR-331-3p	7.97e-07	-2.57667
hsa-miR-331-5p	0.000348	-1.54083
hsa-miR-335	0.0706	-1.0525
hsa-miR-337-3p	0.0062	1.32167
hsa-miR-337-5p	0.256	-0.74583
hsa-miR-338-3p	0.000332	0.68
hsa-miR-338-5p	0.0244	0.81833
hsa-miR-339-3p	0.952	-0.01667
hsa-miR-339-5p	0.106	-0.635
hsa-miR-33a	0.255	0.17333
hsa-miR-33b	0.162	0.2725
hsa-miR-340	0.0846	-0.48083
hsa-miR-342-3p	0.0221	-0.50917
hsa-miR-342-5p	0.0678	-0.58417
hsa-miR-345	0.0721	-1.14917
hsa-miR-346	0.0946	-0.4325
hsa-miR-34a	0.119	-0.44333
hsa-miR-34b	0.507	0.3625
hsa-miR-34c-3p	0.0227	-2.07083
hsa-miR-34c-5p	0.00078	-3.3375
hsa-miR-361-3p	0.704	-0.09
hsa-miR-361-5p	0.143	-0.28833
hsa-miR-362-3p	0.0153	-0.55917
hsa-miR-362-5p	0.2	-0.81
hsa-miR-363	0.0174	1.20667
hsa-miR-365	0.171	0.31333
hsa-miR-367	0.197	0.255
hsa-miR-369-3p	0.0727	0.34667
hsa-miR-369-5p	0.0304	-0.67333
hsa-miR-370	0.175	-0.92583
hsa-miR-371-3p	0.00402	0.46917
hsa-miR-371-5p	0.236	-0.27833
hsa-miR-372	0.177	0.25
hsa-miR-373	0.0978	0.305
hsa-miR-374a	0.99	-0.0025
hsa-miR-374b	1.57e-05	-1.90833
hsa-miR-375	2.54e-05	3.98917
hsa-miR-376a	0.0831	-0.47083
hsa-miR-376b	0.105	-0.28333
hsa-miR-376c	0.41	-0.59083
hsa-miR-377	0.834	-0.04583
hsa-miR-378	0.0163	0.805
hsa-miR-379	0.691	0.27167
hsa-miR-380	0.552	0.1275
hsa-miR-381	0.448	0.5775
hsa-miR-382	0.204	-0.87833
hsa-miR-383	0.0234	0.4575
hsa-miR-384	0.465	-0.15167
hsa-miR-409-3p	0.39	-0.44583
hsa-miR-409-5p	0.0323	-1.41167
hsa-miR-410	0.0572	-0.56333
hsa-miR-411	0.873	-0.10333
hsa-miR-412	0.00604	-0.59917
hsa-miR-421	2.88e-07	-3.275
hsa-miR-422a	0.521	0.34333
hsa-miR-423-3p	0.101	-0.43333
hsa-miR-423-5p	0.377	-0.26667
hsa-miR-424	0.0937	0.32667
hsa-miR-425	0.00369	-0.73917
hsa-miR-429	0.00835	-1.30917
hsa-miR-431	0.002	-1.73083
hsa-miR-432	0.4	-0.57333
hsa-miR-433	0.118	-1.27667
hsa-miR-448	0.0574	0.29167
hsa-miR-449a	0.383	0.56917
hsa-miR-449b	0.503	0.105
hsa-miR-450a	0.115	0.29417
hsa-miR-450b-3p	0.125	0.4075
hsa-miR-450b-5p	0.916	0.0275
hsa-miR-451	0.00915	2.0175
hsa-miR-452	0.02	-1.56833
hsa-miR-453	0.308	0.21
hsa-miR-454	0.000388	-1.24917
hsa-miR-455-3p	7.37e-10	-3.745
hsa-miR-455-5p	2.08e-15	-5.56083
hsa-miR-483-3p	0.965	-0.01333
hsa-miR-483-5p	2.57e-05	-2.32083
hsa-miR-484	0.00577	-1.34667
hsa-miR-485-3p	0.0158	-1.09667
hsa-miR-485-5p	0.391	0.51167
hsa-miR-486-3p	0.0378	0.90167
hsa-miR-486-5p	0.000625	2.5625
hsa-miR-487a	0.00836	-1.49
hsa-miR-487b	0.962	-0.03083
hsa-miR-488	0.185	0.27167
hsa-miR-489	0.383	-0.3675
hsa-miR-490-3p	0.414	0.175
hsa-miR-490-5p	0.0286	0.38083
hsa-miR-491-3p	0.0372	0.49167
hsa-miR-491-5p	0.982	-0.01
hsa-miR-492	0.877	0.05083
hsa-miR-493	0.0732	-1.27667
hsa-miR-494	0.862	-0.09917
hsa-miR-495	0.638	-0.26417
hsa-miR-496	0.871	0.0325
hsa-miR-497	0.0159	-0.88667
hsa-miR-498	0.132	-0.58083
hsa-miR-499-3p	0.164	0.275
hsa-miR-499-5p	0.258	-0.255
hsa-miR-500	0.0976	-1.03083
hsa-miR-501-3p	0.226	-0.39833
hsa-miR-501-5p	0.000261	-1.64667
hsa-miR-502-3p	0.00778	0.58083
hsa-miR-502-5p	0.0997	-0.4275
hsa-miR-503	0.189	-0.64583
hsa-miR-504	0.0478	-0.8825
hsa-miR-505	3.38e-08	-2.555
hsa-miR-506	0.455	-0.375
hsa-miR-507	0.539	0.07667
hsa-miR-508-3p	0.754	0.12417
hsa-miR-508-5p	0.997	0.00167
hsa-miR-509-3-5p	0.586	-0.32667
hsa-miR-509-3p	0.05	-1.59833
hsa-miR-509-5p	0.0985	-0.79583
hsa-miR-510	0.623	-0.24417
hsa-miR-511	0.112	0.25583
hsa-miR-512-3p	1.45e-05	-2.635
hsa-miR-512-5p	0.292	-0.33167
hsa-miR-513a-3p	0.574	0.09
hsa-miR-513a-5p	0.73	0.21167
hsa-miR-513b	0.845	0.0775
hsa-miR-513c	0.287	-0.50583
hsa-miR-514	0.0463	0.40833
hsa-miR-515-3p	0.841	-0.0525
hsa-miR-515-5p	0.0049	0.5
hsa-miR-516a-3p	0.48	0.095
hsa-miR-516a-5p	0.000745	-0.98
hsa-miR-516b	0.000639	-1.91417
hsa-miR-517	0.0133	0.78667
hsa-miR-517a	8.12e-05	-2.34167
hsa-miR-517b	0.00236	-1.40333
hsa-miR-517c	0.562	0.1175
hsa-miR-518a-3p	0.191	0.30667
hsa-miR-518a-5p	0.333	-0.1875
hsa-miR-518b	0.848	-0.03583
hsa-miR-518c	0.81	-0.05167
hsa-miR-518d-3p	0.152	0.44917
hsa-miR-518d-5p	0.0251	-0.615
hsa-miR-518e	0.737	0.0575
hsa-miR-518f	0.438	0.16417
hsa-miR-519a	0.983	0.005
hsa-miR-519b-3p	9.41e-05	-1.14417
hsa-miR-519b-5p	0.00346	-0.97333
hsa-miR-519c-3p	0.0827	0.3275
hsa-miR-519c-5p	0.12	-0.52167
hsa-miR-519d	0.352	0.25833
hsa-miR-519e	0.743	-0.0575
hsa-miR-520a-3p	0.136	0.245
hsa-miR-520a-5p	0.535	-0.10917
hsa-miR-520b	0.577	0.10667
hsa-miR-520c-3p	0.0692	0.36917
hsa-miR-520c-5p	0.341	-0.25
hsa-miR-520d-3p	0.629	-0.12167
hsa-miR-520d-5p	0.0792	0.3775
hsa-miR-520e	0.0582	-0.32083
hsa-miR-520f	0.113	0.21583
hsa-miR-520g	0.746	-0.07667
hsa-miR-520h	0.0967	0.26
hsa-miR-521	0.901	-0.03167
hsa-miR-522	0.636	-0.12083
hsa-miR-523	0.00359	-0.78
hsa-miR-524-3p	0.496	0.12083
hsa-miR-524-5p	0.662	-0.085
hsa-miR-525-3p	0.524	0.11917
hsa-miR-525-5p	0.000174	-1.56667
hsa-miR-526a	0.0506	-0.48833
hsa-miR-526b	0.0115	-0.9175
hsa-miR-527	0.816	-0.04917
hsa-miR-532-3p	0.175	-0.42083
hsa-miR-532-5p	0.83	0.06917
hsa-miR-539	0.107	0.43583
hsa-miR-541	0.252	0.19333
hsa-miR-542-3p	0.0661	-0.31333
hsa-miR-542-5p	0.294	-0.40417
hsa-miR-543	0.491	-0.28083
hsa-miR-544	0.299	0.16417
hsa-miR-545	0.901	0.02667
hsa-miR-548a-3p	0.053	0.99667
hsa-miR-548a-5p	0.0265	0.44417
hsa-miR-548b-3p	0.19	0.33083
hsa-miR-548b-5p	0.0861	0.30083
hsa-miR-548c-3p	0.64	-0.11083
hsa-miR-548c-5p	0.616	-0.09583
hsa-miR-548d-3p	0.0252	0.5325
hsa-miR-548d-5p	0.192	0.24
hsa-miR-548e	0.0331	0.4075
hsa-miR-548f	0.358	0.13833
hsa-miR-548g	0.0481	0.73583
hsa-miR-548h	0.125	0.325
hsa-miR-548i	0.315	0.27667
hsa-miR-548j	0.0885	0.3875
hsa-miR-548k	0.48	0.155
hsa-miR-548l	0.0476	0.4325
hsa-miR-548m	0.416	0.16167
hsa-miR-548n	0.362	0.19083
hsa-miR-548o	0.0654	0.42167
hsa-miR-548p	0.27	0.19917
hsa-miR-549	0.291	0.19167
hsa-miR-550	0.00784	-1.21667
hsa-miR-551a	0.162	-0.50083
hsa-miR-551b	0.269	0.30917
hsa-miR-552	0.0231	-0.42083
hsa-miR-553	0.0645	0.4275
hsa-miR-554	0.161	-0.2575
hsa-miR-555	0.16	-0.24667
hsa-miR-556-3p	0.926	-0.02583
hsa-miR-556-5p	0.799	0.04583
hsa-miR-557	0.682	-0.11583
hsa-miR-558	0.0474	0.49083
hsa-miR-559	0.00657	1.01833
hsa-miR-561	0.0781	0.455
hsa-miR-562	0.238	0.2425
hsa-miR-563	0.813	0.06
hsa-miR-564	0.0878	-0.36583
hsa-miR-566	0.931	-0.02083
hsa-miR-567	0.937	0.01917
hsa-miR-568	0.073	0.47
hsa-miR-569	0.344	-0.13583
hsa-miR-570	0.129	0.36667
hsa-miR-571	0.0575	0.31917
hsa-miR-572	0.854	-0.09333
hsa-miR-573	0.204	0.3225
hsa-miR-574-3p	0.305	0.30833
hsa-miR-574-5p	0.825	0.05083
hsa-miR-575	0.00048	-1.01167
hsa-miR-576-3p	0.287	0.16917
hsa-miR-576-5p	0.335	0.22083
hsa-miR-577	0.0165	0.58
hsa-miR-578	0.913	-0.01417
hsa-miR-579	0.887	0.02917
hsa-miR-580	0.127	0.26
hsa-miR-581	0.909	0.0125
hsa-miR-582-3p	0.136	0.34333
hsa-miR-582-5p	0.0198	0.76
hsa-miR-583	0.359	0.2175
hsa-miR-584	0.000239	-2.23
hsa-miR-585	0.753	0.05
hsa-miR-586	0.767	0.06167
hsa-miR-587	0.572	-0.10833
hsa-miR-588	0.43	0.16083
hsa-miR-589	0.914	-0.03667
hsa-miR-590-3p	0.173	0.21833
hsa-miR-590-5p	0.107	-0.30833
hsa-miR-591	0.0402	0.45917
hsa-miR-592	0.206	0.1975
hsa-miR-593	0.664	-0.15167
hsa-miR-595	0.847	0.04667
hsa-miR-596	0.127	-0.485
hsa-miR-597	0.117	-0.30667
hsa-miR-598	0.186	-0.2825
hsa-miR-599	0.457	0.1175
hsa-miR-600	0.283	0.22833
hsa-miR-601	0.791	0.05333
hsa-miR-602	0.276	-0.385
hsa-miR-603	0.0856	0.70167
hsa-miR-604	0.0922	0.36667
hsa-miR-605	0.0443	0.64917
hsa-miR-606	0.629	-0.11167
hsa-miR-607	0.4	-0.13167
hsa-miR-608	0.0299	0.75
hsa-miR-609	0.839	-0.03167
hsa-miR-610	0.0174	-0.51583
hsa-miR-611	0.25	-0.22583
hsa-miR-612	0.238	-0.2425
hsa-miR-613	0.231	0.36583
hsa-miR-614	0.14	0.29167
hsa-miR-615-3p	0.488	-0.22667
hsa-miR-615-5p	0.583	0.145
hsa-miR-616	0.66	-0.06667
hsa-miR-617	0.00621	1.4125
hsa-miR-618	0.657	0.11417
hsa-miR-619	0.509	-0.17833
hsa-miR-620	0.243	0.22083
hsa-miR-621	0.00978	-0.8325
hsa-miR-622	0.345	0.21417
hsa-miR-623	0.0858	0.42417
hsa-miR-624	0.0277	0.37
hsa-miR-625	0.66	0.36417
hsa-miR-626	0.173	0.23667
hsa-miR-627	0.00101	-0.75583
hsa-miR-628-3p	0.27	-0.5025
hsa-miR-628-5p	0.541	0.2425
hsa-miR-629	0.196	-0.58833
hsa-miR-630	0.285	0.17667
hsa-miR-631	0.782	-0.06583
hsa-miR-632	0.00406	-0.6675
hsa-miR-633	0.0944	0.45167
hsa-miR-634	0.184	0.67333
hsa-miR-635	0.066	0.53917
hsa-miR-636	0.0356	-0.43083
hsa-miR-637	0.0555	-0.60667
hsa-miR-638	0.1	0.625
hsa-miR-639	0.359	-0.1575
hsa-miR-640	0.575	-0.17167
hsa-miR-641	0.666	-0.10833
hsa-miR-642	0.494	0.13333
hsa-miR-643	0.981	0.00417
hsa-miR-644	0.075	0.3075
hsa-miR-645	0.679	0.07
hsa-miR-646	0.0598	0.50667
hsa-miR-647	0.713	-0.09
hsa-miR-648	0.517	-0.15917
hsa-miR-649	0.078	0.39
hsa-miR-650	0.116	0.58667
hsa-miR-651	0.54	0.0975
hsa-miR-652	0.00239	-1.22083
hsa-miR-653	0.038	0.44417
hsa-miR-654-3p	0.0887	-1.00417
hsa-miR-654-5p	0.062	-0.87417
hsa-miR-655	0.0815	0.28833
hsa-miR-656	0.0292	0.42917
hsa-miR-657	0.0806	0.36583
hsa-miR-658	0.91	0.02417
hsa-miR-659	0.224	-0.2575
hsa-miR-660	0.0102	-0.95083
hsa-miR-661	0.141	-0.245
hsa-miR-662	0.0219	0.545
hsa-miR-663	0.816	0.105
hsa-miR-663b	0.00106	-1.42
hsa-miR-664	0.0761	0.4475
hsa-miR-665	0.704	0.13167
hsa-miR-668	0.0406	-0.68083
hsa-miR-671-3p	0.0151	-0.82917
hsa-miR-671-5p	0.00303	-1.195
hsa-miR-675	0.00044	-2.25083
hsa-miR-7	0.0347	0.55083
hsa-miR-708	0.565	-0.40417
hsa-miR-7-1	0.864	-0.04917
hsa-miR-7-2	0.94	0.01833
hsa-miR-720	0.317	0.80917
hsa-miR-744	0.000945	-1.7125
hsa-miR-758	0.0119	-1.00083
hsa-miR-760	0.00506	-0.685
hsa-miR-765	0.0993	-0.43167
hsa-miR-766	0.85	-0.04833
hsa-miR-767-3p	0.119	0.38083
hsa-miR-767-5p	0.309	0.2325
hsa-miR-768-3p	0.592	0.13667
hsa-miR-768-5p	0.604	-0.15167
hsa-miR-769-3p	1.45e-07	-2.63
hsa-miR-769-5p	4.38e-05	-1.95083
hsa-miR-770-5p	0.0461	-0.48583
hsa-miR-802	0.00945	1.04
hsa-miR-873	0.152	0.20833
hsa-miR-874	0.184	-0.49167
hsa-miR-875-3p	0.00655	-0.5075
hsa-miR-875-5p	0.0296	0.56833
hsa-miR-876-3p	0.00776	0.48917
hsa-miR-876-5p	0.09	0.3175
hsa-miR-877	0.0309	-0.8
hsa-miR-885-3p	0.363	-0.56167
hsa-miR-885-5p	0.126	1.20917
hsa-miR-886-3p	0.683	0.29417
hsa-miR-886-5p	0.412	0.57167
hsa-miR-887	0.00668	-1.25083
hsa-miR-888	0.00558	0.52167
hsa-miR-889	0.705	-0.08833
hsa-miR-890	0.243	-0.26667
hsa-miR-891a	0.984	-0.00417
hsa-miR-891b	0.691	-0.1
hsa-miR-892a	0.421	0.16667
hsa-miR-892b	0.0165	0.42667
hsa-miR-9	0.977	-0.00917
hsa-miR-920	0.604	-0.09417
hsa-miR-921	0.049	0.70083
hsa-miR-922	0.837	0.03333
hsa-miR-923	0.00235	1.07167
hsa-miR-924	0.317	0.20833
hsa-miR-92a	1.35e-05	-0.71167
hsa-miR-92a-1	4.8e-06	-2.19333
hsa-miR-92a-2	0.00155	0.79
hsa-miR-92b	0.013	-0.90917
hsa-miR-93	2.35e-08	-1.335
hsa-miR-933	0.335	0.34667
hsa-miR-934	0.0011	-1.72
hsa-miR-935	0.894	-0.03167
hsa-miR-936	0.513	0.13583
hsa-miR-937	0.66	0.11333
hsa-miR-938	0.102	0.3275
hsa-miR-939	0.166	-0.52417
hsa-miR-940	0.0126	1.1525
hsa-miR-941	0.11	-0.66083
hsa-miR-942	0.264	0.17083
hsa-miR-943	0.207	0.35333
hsa-miR-944	0.49	0.11667
hsa-miR-95	0.338	-0.16333
hsa-miR-96	3.05e-05	-1.77583
hsa-miR-98	0.388	-0.2075
hsa-miR-99a	0.00239	0.78417
hsa-miR-99b	0.0269	-0.52333
